# Supplementary material for: Selective removal of deletion-bearing mitochondrial DNA in heteroplasmic Drosophila
Source: PubMed Central journal article supplement (PMC5114534; doi:10.1038/ncomms13100), 2016-11-14
Supplement: ncomms13100-s1.pdf [file ncomms13100-s1.pdf]

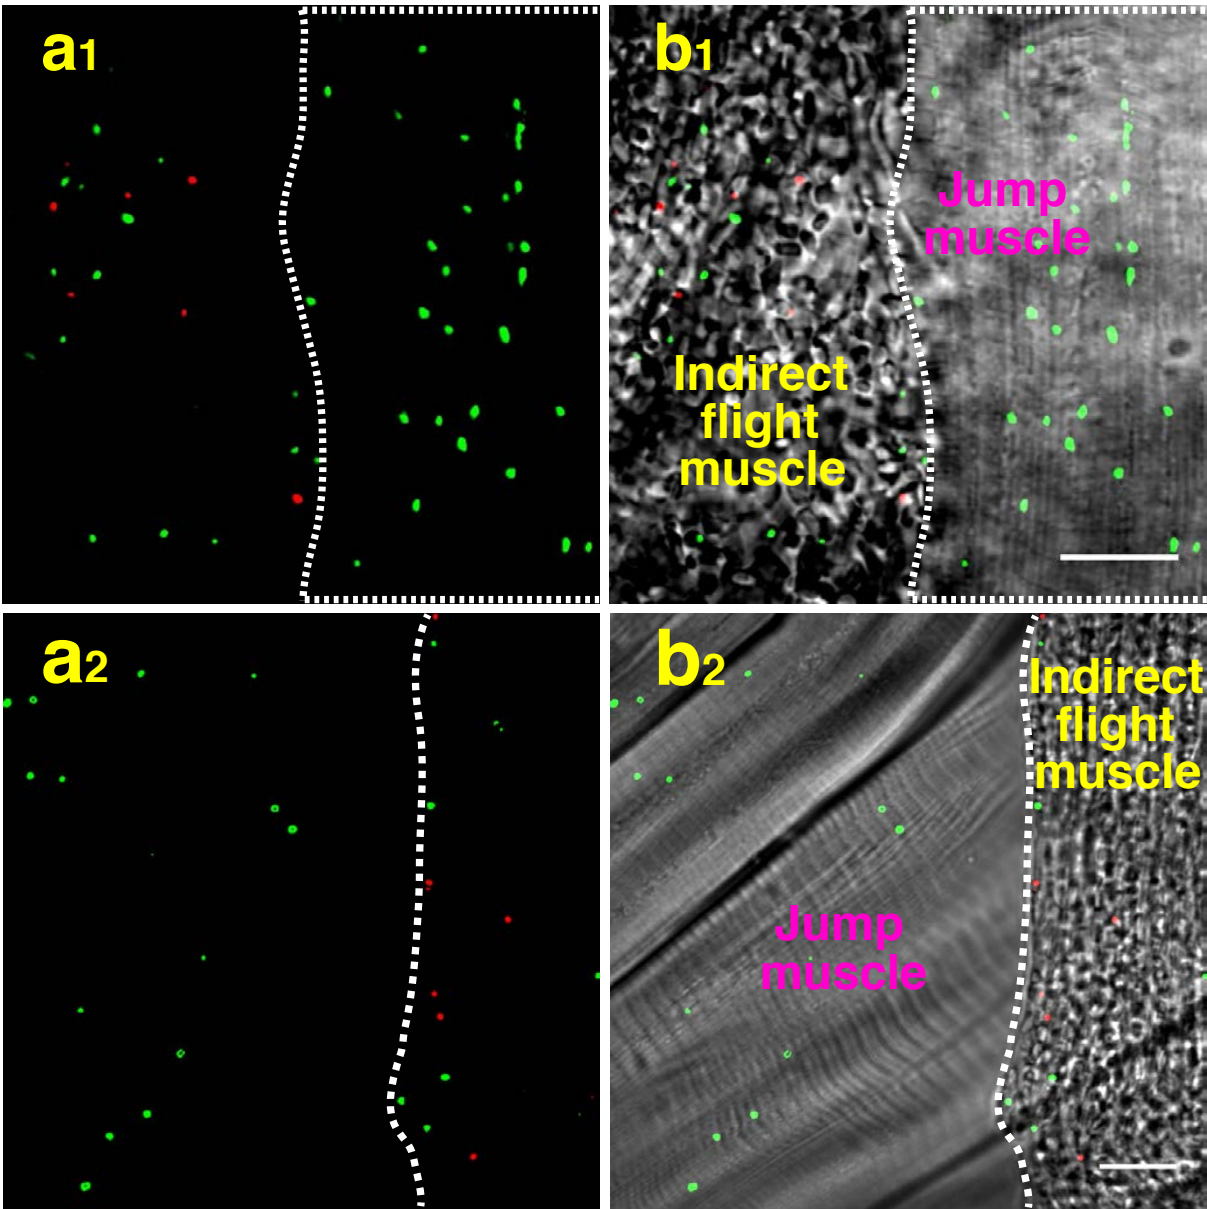

**Supplementary Figure 1. tpRCA detects mtDNA<sup>Δ</sup> in indirect flight muscle (IFM) of *mitoAflIII* flies.** **a**<sub>1-2</sub>, Red and green dots are observed only in the IFMs, in which *mitoAflIII* and *mitoT4 DNA ligase* are expressed, but not in the neighboring jump muscle, **b**<sub>1-2</sub>. The IFMs and jump muscle have very different structures, and can be easily differentiated at the level of light microscopy. Scale bar is 10  $\mu\text{m}$  (**b**).

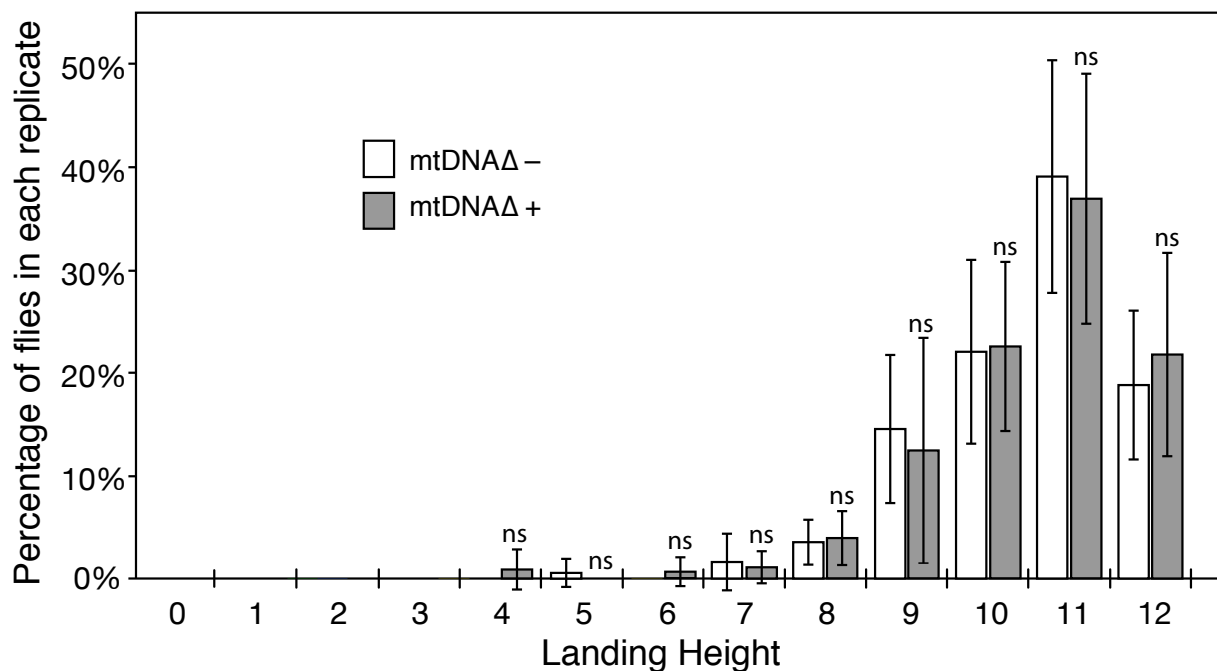

**Supplementary Figure 2. *mitoAflIII* flies display no defect in flight performance.** A flight assay<sup>1-5</sup> was used to compare flight performance between *mitoAflIII* (grey bars) and wildtype (white bars) ten-day-old male flies. Five groups of 30–50 flies of each type were introduced into the top of a 500-mL graduated cylinder whose internal walls were coated with paraffin oil. Wildtype flies quickly initiate horizontal flight, striking the wall close to the entry level, whereas poor fliers land at lower levels or at the bottom of the cylinder. Statistical significance was calculated with respect to percentage of total flies of each type that landed at each height using Student’s *t*-test with unequal variance. Bars depict mean  $\pm$  one standard deviation.  $P > 0.05$  (ns).

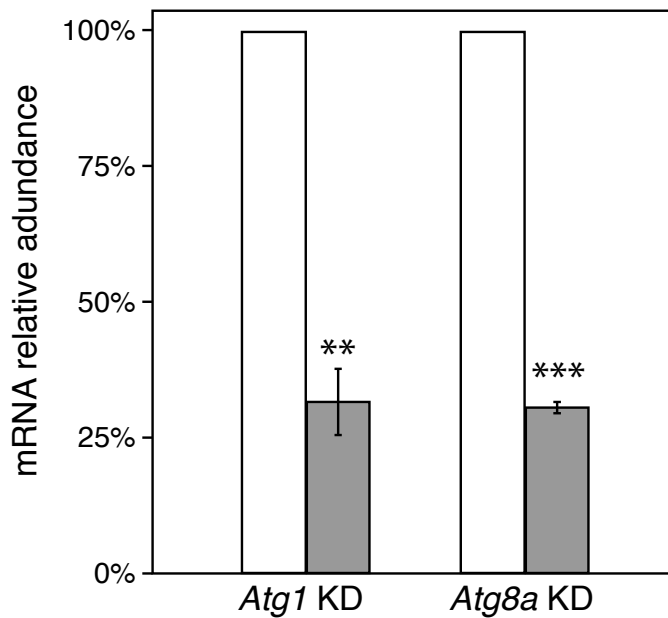

**Supplementary Figure 3. *Atg1* and *Atg8A* RNAi (KD) using *pIFM-Gal4*.** Relative percentages of *Atg1* and *Atg8a* mRNAs in the *pIFM-Gal4 >>pUAS<sup>t</sup>-RNAi* flies (grey) are normalized to those in the *pIFM-Gal4* flies (white). Bars indicate mean  $\pm$  one standard deviations. Statistical significance was calculated using Student's *t*-test with unequal variance.  $P < 0.01$ \*\* and  $P < 0.0001$ \*\*\*.

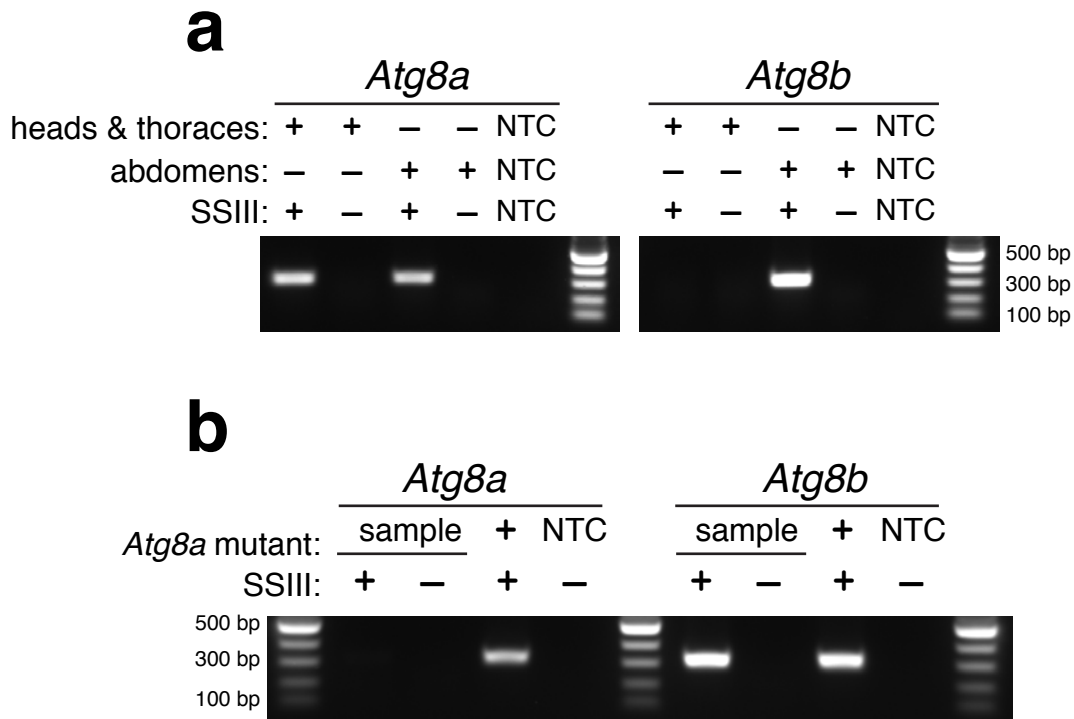

**Supplementary Figure 4. *Drosophila Atg8a* and *Atg8b* transcript analysis in *Atg8a* mutant flies.** *Drosophila* has two paralogs of yeast *Atg8*. **a**, Reverse transcription (RT) PCR analysis shows that *Atg8a* is expressed throughout male flies (heads, thoraces, and abdomens), whereas *Atg8b* transcripts are found only in male abdomens, reflecting expression in the testis (FlyBase.org)<sup>6</sup>. **b**, A P element insertion in the coding region of *Atg8a* (P{SUPor-P}*Atg8a*<sup>KG07569</sup>, referred here as *Atg8a* mutant) causes a massive reduction in the level of *Atg8a* mRNA in the entire fly body. The mRNA abundance of *Atg8b* is not affected in *Atg8a* mutant males.

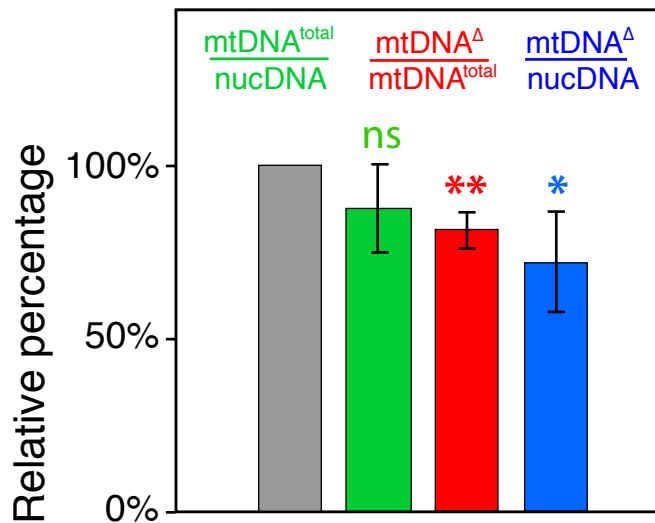

**Supplementary Figure 5. Rapamycin feeding results in decreased mtDNA<sup>Δ</sup> abundance in *mitoAflIII* flies.** Relative abundances of total mtDNA (green) and mtDNA<sup>Δ</sup> (red and blue) in flies fed on food supplemented with 200 $\mu$ M rapamycin were estimated using qPCR and normalized to those present in control *mitoAflIII* flies (grey). Colored bars indicate mean  $\pm$  one standard deviations. Statistical significance is estimated as compared with the corresponding estimate in control flies using Student's *t*-test with unequal variance.  $P > 0.05$ (ns),  $P < 0.05$ \*, and  $P < 0.01$ \*\*.

**Supplementary Table 1. Insertions and their frequencies at the post-cleavage AflIII ligation site in mtDNA<sup>Δ</sup>**

| 5' -GTATTTACTTA                                   | 2580bp              | CATGTTTTTGTAAA-3' |
|---------------------------------------------------|---------------------|-------------------|
| 3' -CATAAATGAATGTAC                               | 2580bp              | AAAAACAATTT-5'    |
| sequence at the ligated post-cleavage site        | Insertion size (bp) | frequency         |
| 5' -GTATTTACTTAc <sup>atg</sup> CATGTTTTTGTAAA-3' | 4                   | 6/20              |
| 5' -GTATTTACTTAc <sup>at</sup> CATGTTTTTGTAAA-3'  | 3                   | 6/20              |
| 5' -GTATTTACTTAc <sup>atg</sup> ATGTTTTTGTAAA-3'  | 3                   | 5/20              |
| 5' -GTATTTACTTAc <sup>c</sup> CATGTTTTTGTAAA-3'   | 1                   | 2/20              |
| 5' -GTATTTACTTA CATGTTTTTGTAAA-3'                 | 0                   | 1/20              |

Two primers flanking both AflIII sites amplify a fragment that spans mtDNA<sup>Δ</sup> deletion from *mitoAflIII* flies. Because direct sequencing of PCR products resulted in an ambiguity at the ligated post-cleavage AflIII site, the fragment was cloned, and 20 clones were sequenced. The sequence at the top depicts double stranded sequences generated after cleavage at both AflIII sites, with the AflIII site indicated in blue. Sequences isolated through PCR and cloning, along with their frequency are indicated. Bases inserted at the ligation sites are shown in red.

**Supplementary Table 2. Viability of progeny from cross between *pUAS-mitoT4lig* lines and Gal4 drivers**

| Gal4 driver      | P{ <i>pUAS-mitoT4lig</i> }attP1 | P{ <i>pUAS-mitoT4lig,pUAS-mitoAflIII</i> }attP1 |
|------------------|---------------------------------|-------------------------------------------------|
| <i>da-Gal4</i>   | viable                          | lethal                                          |
| <i>elav-Gal4</i> | viable                          | lethal                                          |
| <i>mef2-Gal4</i> | viable                          | lethal                                          |
| <i>ey-Gal4</i>   | viable                          | lethal                                          |
| <i>r4-Gal4</i>   | viable                          | lethal                                          |

Expression of *mitoT4lig* driven by five Gal4 drivers did not cause observable defects in *Drosophila*. In contrast, co-expression with *mitoAflIII* resulted in lethality early in development.

**Supplementary Table 3. Amounts of total mtDNA and mtDNA<sup>Δ</sup> in IFMs estimated with qPCR and tpRCA**

| Genetic background                      | qPCR, mtDNA <sup>all</sup> /3R:tub |        |         |         | qPCR, mtDNA <sup>Δ</sup> /mtDNA <sup>total</sup> |         |         |        | qPCR, mtDNA <sup>Δ</sup> /3R:tub |         |               | tpRCA, mtDNA <sup>Δ</sup> /mtDNA <sup>total</sup> |         |         |  |
|-----------------------------------------|------------------------------------|--------|---------|---------|--------------------------------------------------|---------|---------|--------|----------------------------------|---------|---------------|---------------------------------------------------|---------|---------|--|
|                                         | Sample number                      | Mean % | Std Dev | Std Err | Mean %                                           | Std Dev | Std Err | Mean % | Std Dev                          | Std Err | Sample number | Mean %                                            | Std Dev | Std Err |  |
| <i>mitoAflIII</i>                       | 6                                  | 94.18  | 5.33    | 2.18    | 75.63                                            | 1.19    | 0.38    | 77.62  | 0.87                             | 0.35    | 22            | 72.32                                             | 10.93   | 2.33    |  |
| <i>Atg1</i> KD                          | 4                                  | 90.41  | 3.13    | 1.57    | 82.05                                            | 2.18    | 1.09    | 83.20  | 1.75                             | 0.87    | 23            | 93.48                                             | 17.76   | 3.70    |  |
| <i>Atg8a</i> KD                         | 4                                  | 84.27  | 12.40   | 6.20    | 89.41                                            | 0.71    | 0.35    | 89.74  | 2.00                             | 1.00    | 23            | 90.15                                             | 18.05   | 3.77    |  |
| <i>Atg8a</i> mutant                     | 5                                  | 91.64  | 6.47    | 2.89    | 89.40                                            | 2.17    | 0.97    | 91.31  | 3.23                             | 1.44    | 21            | 95.95                                             | 15.42   | 3.37    |  |
| <i>Atg1</i> (6B) OE                     | 4                                  | 94.40  | 1.04    | 0.52    | 3.82                                             | 0.79    | 0.39    | 4.29   | 0.54                             | 0.27    | 22            | 2.66                                              | 1.17    | 0.25    |  |
| <i>Atg8a</i> OE                         | 4                                  | 90.41  | 3.40    | 1.70    | 66.92                                            | 3.08    | 1.54    | 66.91  | 3.48                             | 1.74    | 26            | 70.12                                             | 15.04   | 2.95    |  |
| <i>Parkin</i> OE                        | 4                                  | 76.48  | 4.73    | 2.37    | 5.08                                             | 0.32    | 0.16    | 4.26   | 0.32                             | 0.16    | 22            | 2.47                                              | 1.14    | 0.24    |  |
| <i>PINK1</i> OE                         | 4                                  | 91.34  | 5.51    | 2.75    | 26.24                                            | 2.67    | 1.33    | 27.49  | 0.70                             | 0.35    | 24            | 16.19                                             | 4.91    | 1.00    |  |
| <i>Parkin</i> OE in <i>Atg8a</i> mutant | 4                                  | 92.25  | 2.32    | 1.16    | 82.26                                            | 1.93    | 0.97    | 84.19  | 1.17                             | 0.59    | 26            | 67.20                                             | 20.98   | 4.11    |  |
| <i>Mfn</i> KD                           | 4                                  | 94.51  | 0.28    | 0.14    | 39.16                                            | 1.29    | 0.65    | 43.29  | 3.32                             | 1.66    | 26            | 26.05                                             | 8.99    | 1.76    |  |
| <i>Drp1</i> OE                          | 4                                  | 94.57  | 0.76    | 0.38    | 88.13                                            | 1.89    | 0.94    | 90.32  | 1.82                             | 0.91    | 28            | 90.85                                             | 17.86   | 3.37    |  |
| <i>ATPIF1</i> OE                        | 4                                  | 92.38  | 3.15    | 2.18    | 68.28                                            | 8.53    | 4.26    | 69.19  | 8.40                             | 4.20    | N/A           | N/A                                               | N/A     | N/A     |  |
| <i>ATPIF1</i> OE in <i>Mfn</i> KD       | 4                                  | 89.69  | 5.32    | 2.65    | 11.61                                            | 0.71    | 0.35    | 11.43  | 0.98                             | 0.49    | N/A           | N/A                                               | N/A     | N/A     |  |

All genetic backgrounds contained P{*pIFM-mitoAflIII*, *pIFM-mitoT4lig*, *pIFM-Gal4*}attP1 transgene (*mitoAflIII*), in an otherwise wildtype background (top row), or in combination with other mutations or transgenes supporting overexpression (OE) or knock down (KD) of a tested gene. To compare relative estimations calculated with qPCR and tpRCA on the same scale, we computed normalized percentages relative to *mitoAflIII* flies. A fold difference was calculated between relative amounts in *mitoAflIII* alone and in combination with a tested gene backgrounds using qPCR (see methods), then the fold difference was normalized to the corresponding percentage estimation in *mitoAflIII* flies (Fig. 2d). P-element insertion in a coding area of *Atg8a* (*Atg8a* mutant) caused a massive reduction in *Atg8a* expression and is thought to represent a strong hypomorph or null mutant (Supplementary Fig. 4)<sup>7</sup>. tpRCA was used to visualize and quantify mtDNA<sup>Δ</sup> and mtDNA<sup>total</sup> molecules in whole mounts of *Drosophila* IFMs. Amounts of mtDNA<sup>Δ</sup> were estimated directly from confocal images as percentage of total mtDNA (mtDNA<sup>total</sup>), multiplied by 3/2 (see methods for details).



**Supplementary Table 4. Primers for quantification of mtDNA<sup>Δ</sup> amount with qPCR**

| Name                         | Estimate                | 5'- Sequence- 3'                                                           | Amplicon size (bp) |
|------------------------------|-------------------------|----------------------------------------------------------------------------|--------------------|
| <i>mtAflIII</i> <sup>Δ</sup> | mtDNA <sup>Δ</sup>      | 5' -CATATTTGTCGAGACGTTAATTATGGTTG-3'<br>5' -GAATTCGGCAAAAATAATATTCGCCTG-3' | 129                |
| <i>mt:CytB</i>               | mtDNA <sup>WT</sup>     | 5' -TAGTGTTAATCATATTTGTCGAGACGTT-3'<br>5' -ATATGAACCGTAATAAATTCCTCGTCC-3'  | 130                |
| <i>mt:ND5</i>                | mtDNA <sup>total</sup>  | 5' -GAAGTAAAGCTACATCCCCAATTCG-3'<br>5' -GGTGAGATGGTTTAGGACTTGTTTC-3'       | 113                |
| <i>3R:tub</i>                | nuclear DNA<br>(nucDNA) | 5' -TATAAGTAAAGGCAGCAGGGAGAC-3'<br>5' -ATCTGGGTACTCTTCCTCTCCATC-3'         | 121                |

**Supplementary Table 5. Primers for reverse transcription (RT) qPCR**

| Annotation number | Gene symbol                  | 5'- Sequence- 3'                                                  | Amplicon size (bp) |
|-------------------|------------------------------|-------------------------------------------------------------------|--------------------|
| CG10967           | <i>Atg1</i>                  | 5' -CAGGAGGACGAGAACACGGTGTC-3'<br>5' -GGAAGGTTCTTTGGCACCAGCAC-3'  | 155                |
| CG32672           | <i>Atg8a</i>                 | 5' -TATCCAGACCGTGTGCCCGTC-3'<br>5' -GTGGATGCGCTTGCGAATGAGG-3'     | 136                |
| CG2135            | <i><math>\beta</math>Glu</i> | 5' -TGGAGGGCATGCACTCACTTC-3'<br>5' -GGTCCGAAAATCGGCGAAGTTCC-3'    | 147                |
| <i>mitoAflIII</i> | <i>AflIII</i>                | 5' -AGCTGTAGATCTAAAAGGCGGCCG-3'<br>5' -ATAGCAGCTGGCGTGGAATTGGC-3' | 141                |

**Supplementary Table 6. Padlock probes and corresponding detection probes**

| Probe                                   | Estimate                                     | 5'- Sequence- 3'                                                                                                                        |
|-----------------------------------------|----------------------------------------------|-----------------------------------------------------------------------------------------------------------------------------------------|
| ppMtDNA <sup>total</sup>                | mtDNA <sup>total</sup>                       | 5' -P- <u>CTTCAATATATTCATAAGCTAGTCTTGTTACGT</u><br>TTAAACCTCAACGTACTTGATTGGCTCCTTCTTAGTCA<br><u>GTCTGCAATAGTAAATGGAG</u> -3'            |
| dpMtDNA <sup>total</sup> -<br>Alexa®488 | tpRCA product<br>of ppMtDNA <sup>total</sup> | 5' - <u>Alexa488</u> -CCTCAACGTACTTGATTGGCTCC-3'                                                                                        |
| ppMtDNA <sup>Δ</sup>                    | mtDNA <sup>Δ</sup>                           | 5' -P- <u>GTAATAATCAACCATAATTATCTTTCTTCGTCC</u><br><u>TCATTGCTGCTGCTGTACTAC</u> TAGTTCTTGTACTIONACT<br><u>CACCGTTAGCATGTAAAGTTC</u> -3' |
| dpMtDNA <sup>Δ</sup> -<br>TAMRA         | RCA product of<br>ppMtDNA <sup>Δ</sup>       | 5' - <u>TAMRA</u> -CCTCATTGCTGCTGCTGTACTAC-3'                                                                                           |

The probes were purchased from Integrated DNA Technologies®. P, 5' phosphate. Target-complementary sequences of padlock probes are underscored and tag sequence segments of padlock probes used for fluorescence detection are color coded.

## Supplementary Methods

**qPCR quantification of relative amounts of mtDNA<sup>Δ</sup>.** To quantify the amounts of mtDNA<sup>Δ</sup> relative to both mtDNA<sup>total</sup> and nuclear DNA (nucDNA) we applied the  $\Delta\Delta\text{Ct}$  algorithm as follows:

Normalizer #1 (mtDNA<sup>total</sup>, *mt:NADH5*)

$$\Delta\text{Ct}_{\text{mtDNA}^{\Delta}}_{\text{sample}} = \text{Ct}_{\text{mtDNA}^{\Delta}} - \text{Ct}_{\text{mtDNA}^{\text{total}}}$$

$$\Delta\text{Ct}_{\text{mtDNA}^{\Delta}}_{\text{reference}} = \text{Ct}_{\text{mtDNA}^{\Delta}} - \text{Ct}_{\text{mtDNA}^{\text{total}}}$$

$$\Delta\Delta\text{Ct} = \Delta\text{Ct}_{\text{mtDNA}^{\Delta}}_{\text{sample}} - \Delta\text{Ct}_{\text{mtDNA}^{\Delta}}_{\text{reference}}$$

$$\text{Fold difference} = 2^{-\Delta\Delta\text{Ct}}$$

Normalizer #2 (nucDNA, *3R:Tube*)

$$\Delta\text{Ct}_{\text{mtDNA}^{\Delta}}_{\text{sample}} = \text{Ct}_{\text{mtDNA}^{\Delta}} - \text{Ct}_{\text{nucDNA}}$$

$$\Delta\text{Ct}_{\text{mtDNA}^{\Delta}}_{\text{reference}} = \text{Ct}_{\text{mtDNA}^{\Delta}} - \text{Ct}_{\text{nucDNA}}$$

$$\Delta\Delta\text{Ct} = \Delta\text{Ct}_{\text{mtDNA}^{\Delta}}_{\text{sample}} - \Delta\text{Ct}_{\text{mtDNA}^{\Delta}}_{\text{reference}}$$

$$\text{Fold difference} = 2^{-\Delta\Delta\text{Ct}}$$

**RT-qPCR quantification of transcript abundance.** We calculated a fold difference in transcript number of a gene of interest (GOI) following Pfaffl<sup>8</sup> to account for differences in amplification efficiencies of used primers using the following equation:

$$\Delta\text{Ct}_{\text{GOI}} = \text{Ct}_{\text{GOI}}^{\text{test}} - \text{Ct}_{\text{GOI}}^{\text{reference}}$$

$$\Delta\text{Ct}_{\beta\text{Glu}} = \text{Ct}_{\beta\text{Glu}}^{\text{test}} - \text{Ct}_{\beta\text{Glu}}^{\text{reference}}$$

E = efficiency from a standard curve,  $E = 10^{-1/\text{slope}}$

$$\text{Fold difference} = E_{\text{GOI}}^{\Delta\text{Ct}(\text{GOI})} / E_{\text{Mlc2}}^{\Delta\text{Ct}(\beta\text{Glu})}$$

### Supplementary References:

- 1 Benzer, S. Genetic dissection of behaviour. *Sci. Am.* **229**, 24-37 (1973).
- 2 Banerjee, S., Lee, J., Venkatesh, K., Wu, C. F. & Hasan, G. Loss of flight and associated neuronal rhythmicity in inositol 1,4,5-trisphosphate receptor mutants of *Drosophila*. *J. Neurosci.* **24**, 7869-7878, doi:10.1523/JNEUROSCI.0656-04.2004 (2004).
- 3 Walker, D. W. & Benzer, S. Mitochondrial “swirls” induced by oxygen stress and in the *Drosophila* mutant hyperswirl. *Proc. Natl. Acad. Sci. USA* **101**, 10290-10295, doi:10.1073/pnas.0403767101 (2004).
- 4 Venkiteswaran, G. & Hasan, G. Intracellular Ca<sup>2+</sup> signaling and store-operated Ca<sup>2+</sup> entry are required in *Drosophila* neurons for flight. *Proc. Natl. Acad. Sci. USA* **106**, 10326-10331, doi:10.1073/pnas.0902982106 (2009).
- 5 Sadaf, S., Birman, S. & Hasan, G. Synaptic activity in serotonergic neurons is required for air-puff stimulated flight in *Drosophila melanogaster*. *PLoS One* **7**, e46405, doi:10.1371/journal.pone.0046405 (2012).
- 6 The modENCODE Consortium. Identification of Functional Elements and Regulatory Circuits by *Drosophila* modENCODE. *Science* **330**, 1787-1797, doi:10.1126/science.1198374 (2010).
- 7 Nezis, I. P. *et al.* Ref(2)P, the *Drosophila melanogaster* homologue of mammalian p62, is required for the formation of protein aggregates in adult brain. *J. Cell Biol.* **180**, 1065-1071, doi:10.1083/jcb.2007111108 (2008).
- 8 Pfaffl, M. W. in *A-Z of Quantitative PCR* (ed Stephen A. Bustin) 87-120 (International University Line, 2004).
